# Supplementary material for: Structures and dynamic stereochemistry of 9-arylselanyltriptycenes: X-ray crystallographic, spectroscopic and theoretical investigations
Source: Royal Society of Chemistry journal article supplement (doi:10.1039/b817949b), 2009-01-01
Supplement: b817949b.pdf [file b817949b.pdf]

## *Supporting Information:*

### **Structures and Dynamic Stereochemistry of 9-Arylselanyltriptycenes: X-ray Crystallographic, Spectroscopic and Theoretical Investigations**

**Takashi Nakamoto,<sup>a</sup> Satoko Hayashi,<sup>a</sup> Waro Nakanishi,<sup>\*a</sup> Mao Minoura<sup>b</sup> and  
Gaku Yamamoto<sup>b</sup>**

<sup>a</sup> *Department of Material Science and Chemistry, Faculty of Systems Engineering, Wakayama University, 930 Sakaedani, Wakayama 640-8510, JAPAN*

Fax: +81-73-457-8253

E-mail: nakanisi@sys.wakayama-u.ac.jp

<sup>b</sup> *Department of Chemistry, School of Science, Kitasato University, Kitasato, Sagamihara, Kanagawa 228-8555, JAPAN*

#### Contents

|                                                                                                                                                                                                                                                                           |        |
|---------------------------------------------------------------------------------------------------------------------------------------------------------------------------------------------------------------------------------------------------------------------------|--------|
| <b>Fig. S1</b> ORTEP drawing of <b>1c</b> with atomic numbering scheme for selected atoms (50% probability thermal level): (a) side view and (b) top view.                                                                                                                | S2     |
| <b>Fig. S2</b> ORTEP drawing of <b>1d</b> with atomic numbering scheme for selected atoms (50% probability thermal level): (a) side view and (b) top view.                                                                                                                | S2     |
| <b>Fig. S3</b> NMR spectra (600 MHz) due to the aromatic protons of <b>1a</b> in CD <sub>2</sub> Cl <sub>2</sub> at various temperatures.                                                                                                                                 | S3     |
| <b>Fig. S4</b> NMR spectra (600 MHz) due to the aromatic protons of <b>1c</b> in CD <sub>2</sub> Cl <sub>2</sub> at various temperatures.                                                                                                                                 | S3     |
| <b>Fig. S5</b> The observed <sup>1</sup> H NMR spectra (600 MHz) due to the aromatic protons region of <b>1e</b> in CD <sub>2</sub> Cl <sub>2</sub> at various temperatures (a) and the calculated spectra with the best-fit rate constants for the inter-conversion (b). | S4     |
| <b>Table S1</b> Results of QC calculations on <b>1a</b> , <b>1b'</b> and <b>1f</b> for (A: <b>pl</b> ), (A: <b>pd</b> ) and (B: <b>pd</b> ) at the DFT level.                                                                                                             | S4     |
| Optimized structures given by Cartesian coordinates for <b>1a</b> , <b>1b'</b> , <b>1e</b> and <b>1f</b> , together with the total energies and the method for the calculations.                                                                                          | S5-S15 |

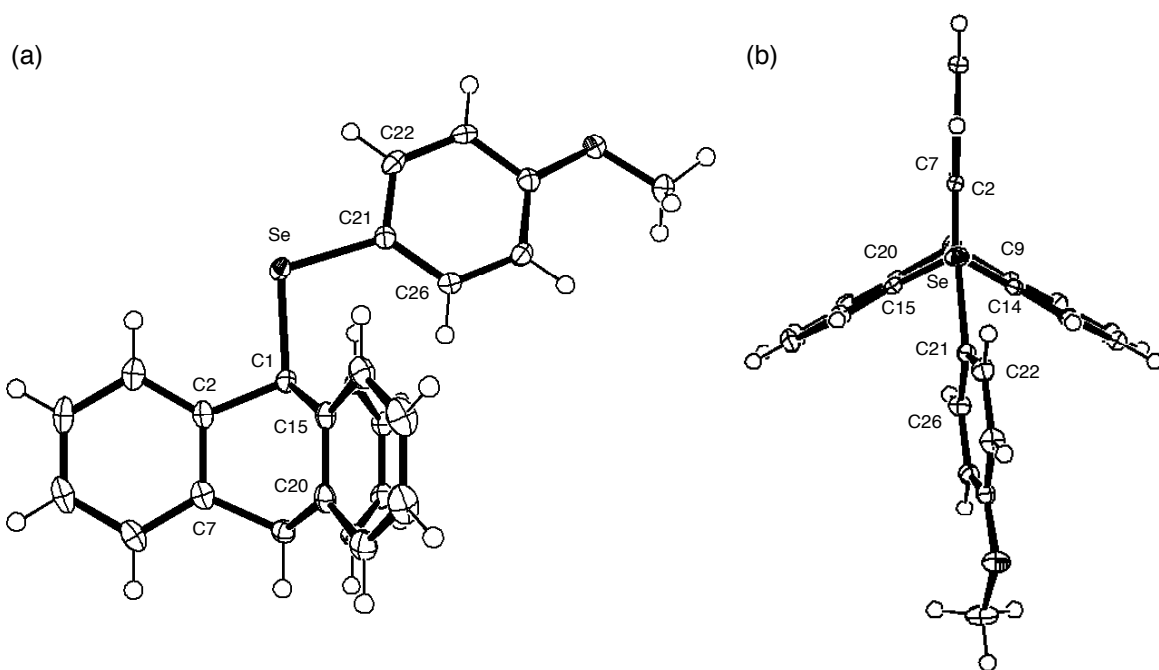

**Fig. S1** ORTEP drawing of **1c** with atomic numbering scheme for selected atoms (50% probability thermal level): (a) side view and (b) top view.

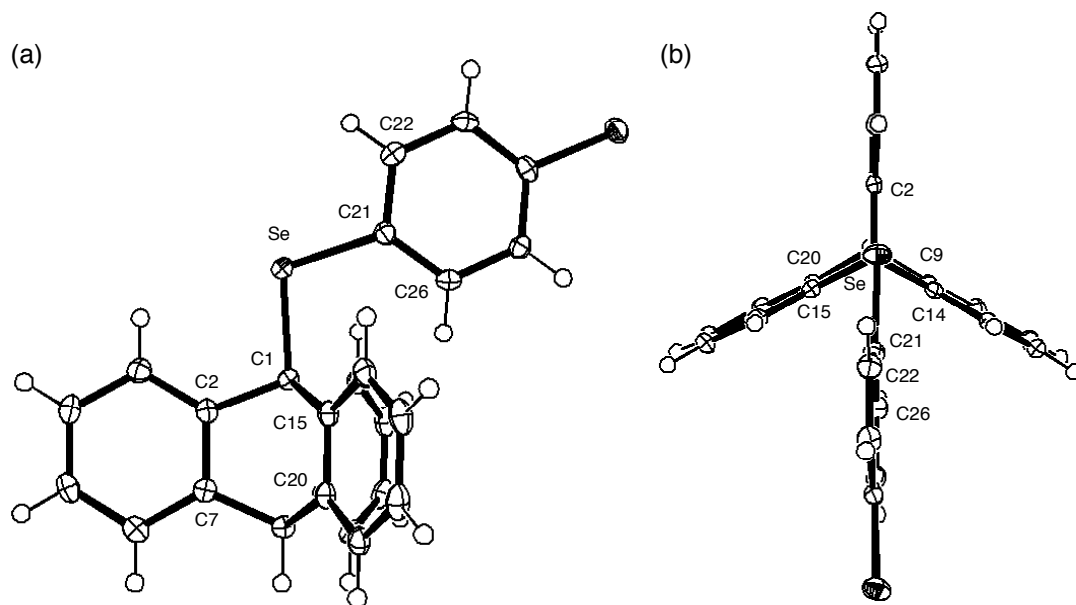

**Fig. S2** ORTEP drawing of **1d** with atomic numbering scheme for selected atoms (50% probability thermal level): (a) side view and (b) top view.

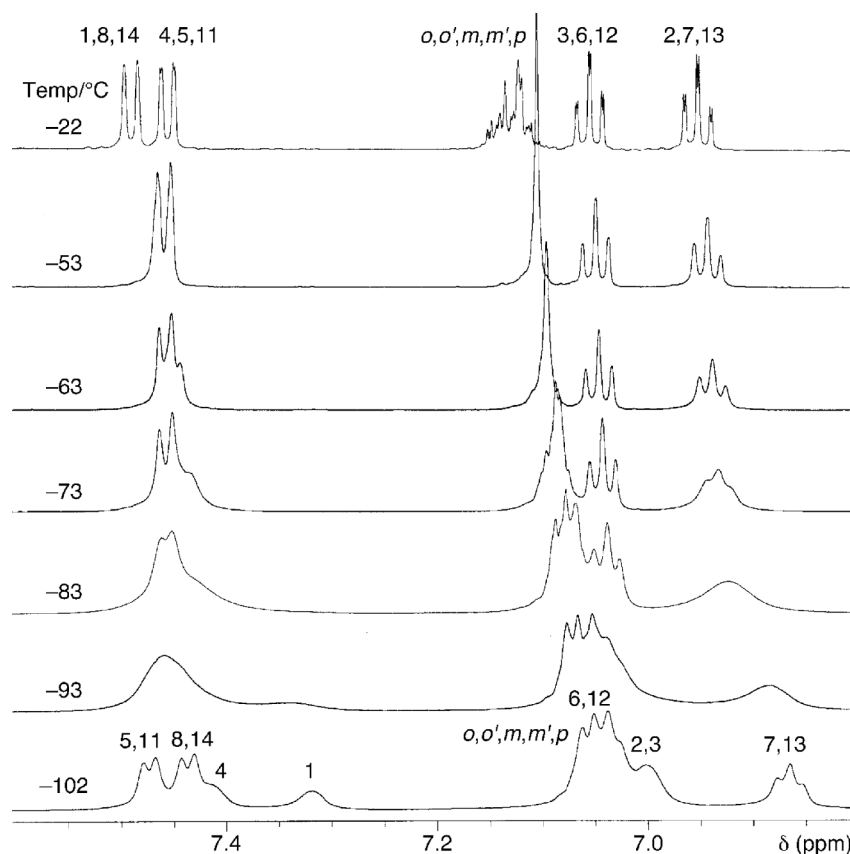

**Fig. S3** NMR spectra (600 MHz) due to the aromatic protons of **1a** in CD<sub>2</sub>Cl<sub>2</sub> at various temperatures.

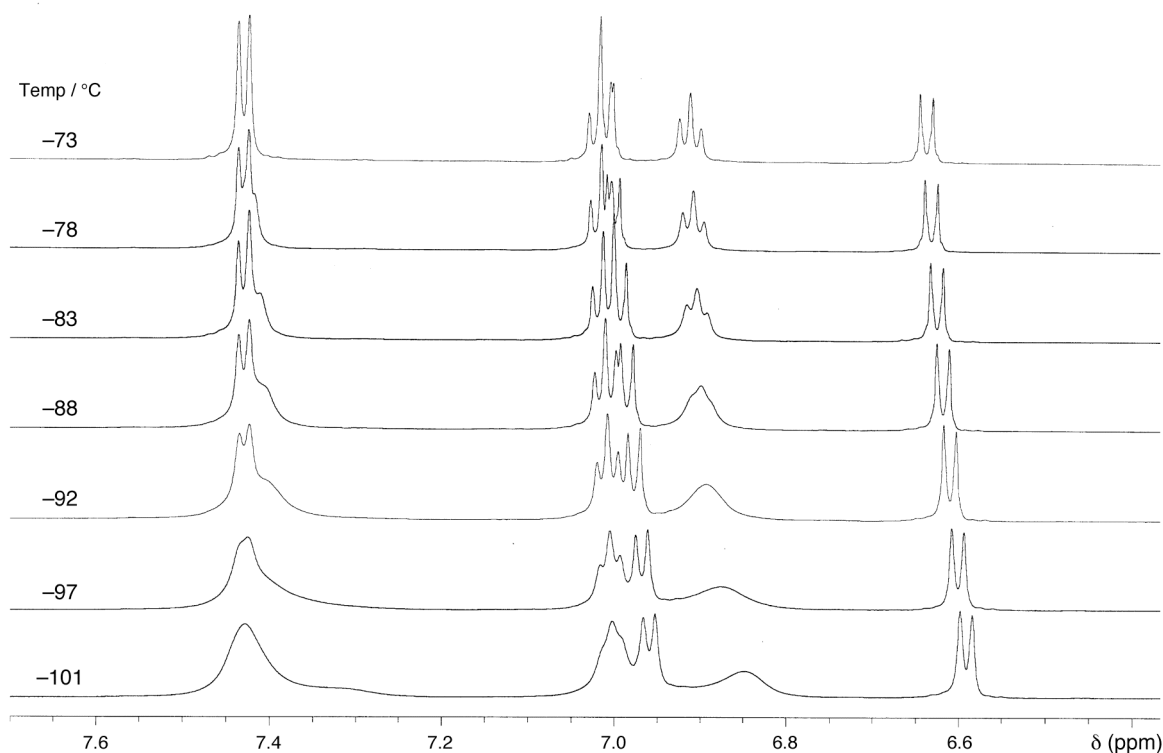

**Fig. S4** NMR spectra (600 MHz) due to the aromatic protons of **1c** in CD<sub>2</sub>Cl<sub>2</sub> at various temperatures.

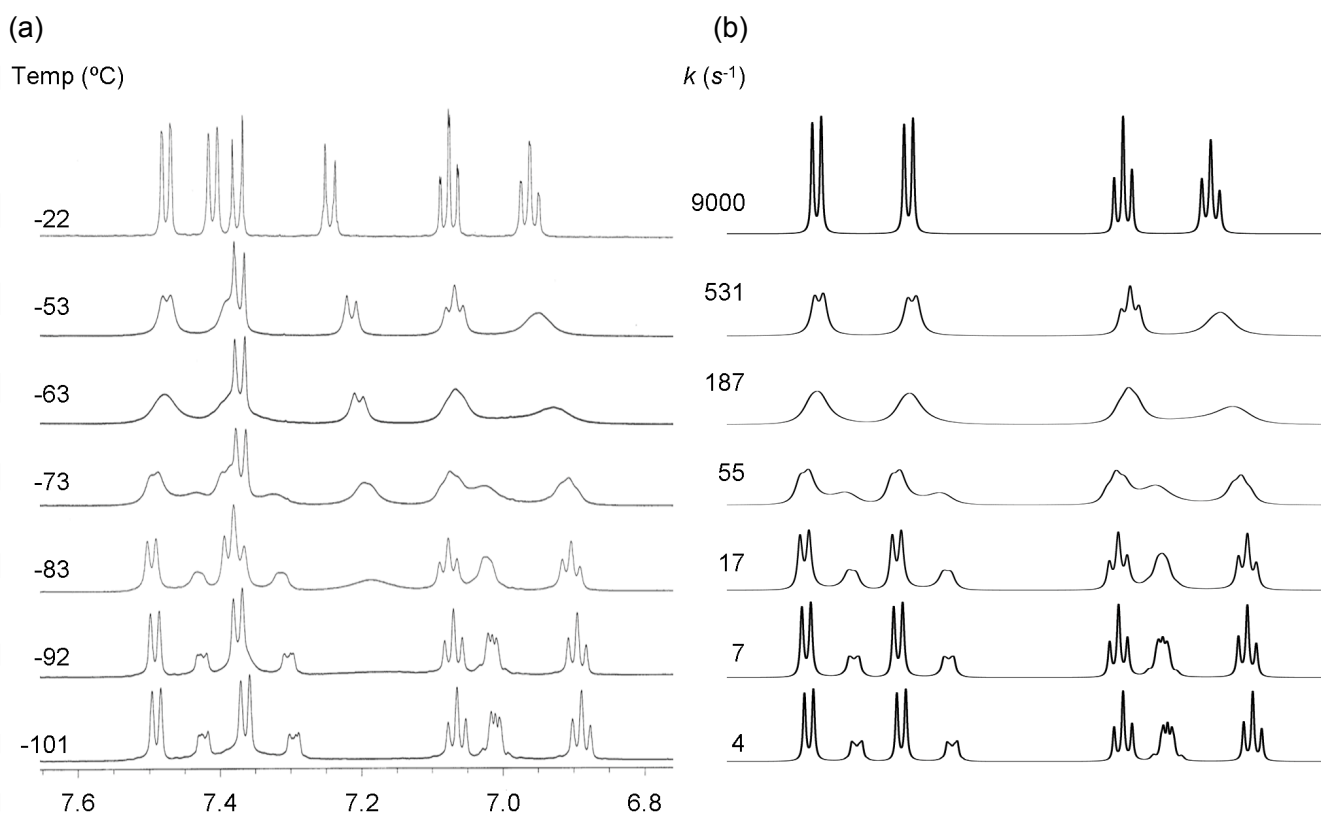

**Fig. S5** The observed  $^1\text{H}$  NMR spectra (600 MHz) due to the aromatic protons region of **1e** in  $\text{CD}_2\text{Cl}_2$  at various temperatures (a) and the calculated spectra with the best-fit rate constants for the inter-conversion (b).

**Table S1** shows the results of QC calculations on **1a** employing the 6-311+G(d) basis sets for Se and the 4-31G(d) basis sets for C and H (basis sets-A) at the MP2 level. **1a** (A: **pd**) and **1a** (B: **pd**) are optimized to be less stable than **1a** (A: **pl**) by 19.4 and 30.2  $\text{kJ mol}^{-1}$ , respectively, on the potential energy surface. Frequency analysis is applied on the optimized structures of **1a** with the same method. Whereas all frequencies are positive for **1a** (A: **pl**), only one imaginary frequency is predicted for each of **1a** (A: **pd**) and **1a** (B: **pd**). The sum of electronic and thermal Gibbs free energies at 298.15 K for **1a** (A: **pd**) and **1a** (B: **pd**) relative to **1a** (A: **pl**) amount to 27.0 and 37.0  $\text{kJ mol}^{-1}$ , respectively. The evaluated energy difference for **1a** (B: **pd**) on the potential energy surface (30.2  $\text{kJ mol}^{-1}$ ) is about 6  $\text{kJ mol}^{-1}$  smaller than the observed activation energy for GR (36.4  $\text{kJ mol}^{-1}$ ). However, the calculated activation energy (37.0  $\text{kJ mol}^{-1}$ ) is very close to the observed value for GR if the sum of electronic and thermal Gibbs free energy at 298.15 K is considered.

**Table S1** Results of QC calculations with and without the frequency analysis on **1a** (A: **pl**), **1a** (A: **pd**), and **1a** (B: **pd**) at the MP2 level.<sup>a</sup>

| Compd                                   | <b>1a</b> (A: <b>pl</b> ) | <b>1a</b> (A: <b>pd</b> ) | <b>1a</b> (B: <b>pd</b> ) |
|-----------------------------------------|---------------------------|---------------------------|---------------------------|
| Symmetry                                | $C_s$                     | $C_s$                     | $C_s$                     |
| $E^b/\text{au}$                         | -3396.0128                | -3396.0054                | -3396.0013                |
| $\Delta E^b/\text{kJ mol}^{-1}$         | 0.0 <sup>c</sup>          | 19.4                      | 30.2                      |
| $\nu_1^d$ (character)/ $\text{cm}^{-1}$ | 8.5 (A'')                 | -41.2 (A'')               | -34.4 (A'')               |
| $\nu_2^e$ (character)/ $\text{cm}^{-1}$ | 48.6 (A')                 | 33.6 (A')                 | 44.4 (A')                 |
| ZPC <sup>f</sup> /au                    | 0.3533                    | 0.3537                    | 0.3534                    |
| TCF <sup>g</sup> /au                    | 0.3031                    | 0.3060                    | 0.3057                    |
| $E_F^h/\text{au}$                       | -3395.7097                | -3395.6994                | -3395.6956                |
| $\Delta E_F^h/\text{kJ mol}^{-1}$       | 0.0 <sup>c</sup>          | 27.0                      | 37.0                      |
| Meaning                                 | minimum                   | TS for IR                 | TS for GR                 |

<sup>a</sup> The 6-311+G(d) basis sets being employed for Se and the 4-31G basis sets for C and H (basis sets-A).  
<sup>b</sup> Values on the energy potential surface. <sup>c</sup> Taken as the standard. <sup>d</sup> Lowest frequency obtained by the frequency analysis. <sup>e</sup> Second-lowest frequency obtained by the frequency analysis. <sup>f</sup> Zero-point correction. <sup>g</sup> Thermal correction to Gibbs free energy at 298.15 K. <sup>h</sup> Sum of electronic and thermal Gibbs free energies at 298.15 K.

**Table S2** Results of QC calculations on **1a**, **1b'**, **1e** and **1f** at the MP2 level.<sup>a,b</sup>

| Compd      | $E(\text{A: pl})$             | $\Delta E(\text{A: pd})^c$ | $\Delta E(\text{B: pd})^c$ | $\Delta\Delta E^d$   |
|------------|-------------------------------|----------------------------|----------------------------|----------------------|
|            | au ( $\text{kJ mol}^{-1}$ )   | $\text{kJ mol}^{-1}$       | $\text{kJ mol}^{-1}$       | $\text{kJ mol}^{-1}$ |
| <b>1a</b>  | -3398.4101 (0.0) <sup>e</sup> | 25.1                       | 34.0                       | 8.9                  |
| <b>1b'</b> | -3453.6003 (0.0) <sup>e</sup> | 20.4 <sup>f</sup>          | 29.0                       | 8.6                  |
| <b>1e</b>  | -3490.4203 (0.0) <sup>e</sup> | 29.6                       | 39.1                       | 9.5                  |
| <b>1f</b>  | -3602.4129 (0.0) <sup>e</sup> | 30.0                       | 39.9                       | 9.9                  |

<sup>a</sup> The 6-311+G(d) basis sets being employed for Se and the 6-31G(d) basis sets for H, C, N and O (basis sets-B). <sup>b</sup> The  $C_s$  symmetry being assumed. <sup>c</sup>  $\Delta E = E(\text{A or B: pd}) - \Delta E(\text{A: pl})$ . <sup>d</sup>  $\Delta\Delta E = \Delta E(\text{B: pd}) - \Delta E(\text{A: pd})$ . <sup>e</sup> Taken as the standard. <sup>f</sup> The  $C_1$  symmetry being assumed.

Optimized structures given by Cartesian coordinates for **1a**, **1b'**, **1e** and **1f**, together with the total energies and the method for the calculations.

The 6-311+G(d) basis sets being employed for Se and the 6-31G(d) basis sets for C and H at the MP2 level.

**1a (A: pl)**

Total energy: -3398.4100806 hartrees

|    |   |           |           |           |
|----|---|-----------|-----------|-----------|
| 6  | 0 | 0.393830  | -0.413937 | 0.000000  |
| 6  | 0 | 1.066958  | -1.791925 | 0.000000  |
| 6  | 0 | 2.854369  | -3.414596 | 0.000000  |
| 6  | 0 | 2.432996  | -2.078218 | 0.000000  |
| 6  | 0 | 0.129146  | -2.842537 | 0.000000  |
| 6  | 0 | 1.922314  | -4.455267 | 0.000000  |
| 6  | 0 | 0.551708  | -4.169643 | 0.000000  |
| 1  | 0 | 3.918531  | -3.639442 | 0.000000  |
| 1  | 0 | 3.176635  | -1.284563 | 0.000000  |
| 1  | 0 | 2.261585  | -5.488649 | 0.000000  |
| 1  | 0 | -0.180865 | -4.975536 | 0.000000  |
| 6  | 0 | -0.513039 | -0.423964 | 1.234660  |
| 6  | 0 | -1.372460 | 0.259103  | 3.384253  |
| 6  | 0 | -0.465413 | 0.437770  | 2.332521  |
| 6  | 0 | -1.445546 | -1.477363 | 1.211875  |
| 6  | 0 | -2.313875 | -0.773884 | 3.348097  |
| 6  | 0 | -2.348414 | -1.652144 | 2.259207  |
| 1  | 0 | -1.339725 | 0.932729  | 4.237719  |
| 1  | 0 | 0.267411  | 1.239131  | 2.372769  |
| 1  | 0 | -3.013643 | -0.901329 | 4.171092  |
| 1  | 0 | -3.064055 | -2.472761 | 2.232202  |
| 6  | 0 | -0.513039 | -0.423964 | -1.234660 |
| 6  | 0 | -1.372460 | 0.259103  | -3.384253 |
| 6  | 0 | -0.465413 | 0.437770  | -2.332521 |
| 6  | 0 | -1.445546 | -1.477363 | -1.211875 |
| 6  | 0 | -2.313875 | -0.773884 | -3.348097 |
| 6  | 0 | -2.348414 | -1.652144 | -2.259207 |
| 1  | 0 | -1.339725 | 0.932729  | -4.237719 |
| 1  | 0 | 0.267411  | 1.239131  | -2.372769 |
| 1  | 0 | -3.013643 | -0.901329 | -4.171092 |
| 1  | 0 | -3.064055 | -2.472761 | -2.232202 |
| 6  | 0 | -1.313453 | -2.373362 | 0.000000  |
| 1  | 0 | -2.031487 | -3.202647 | 0.000000  |
| 34 | 0 | 1.758545  | 0.999225  | 0.000000  |
| 6  | 0 | 0.701623  | 2.607529  | 0.000000  |
| 6  | 0 | -0.699200 | 2.652325  | 0.000000  |
| 6  | 0 | -1.345883 | 3.892697  | 0.000000  |
| 6  | 0 | -0.614752 | 5.082380  | 0.000000  |
| 6  | 0 | 0.782607  | 5.030974  | 0.000000  |
| 6  | 0 | 1.441641  | 3.800846  | 0.000000  |
| 1  | 0 | -1.287737 | 1.741674  | 0.000000  |
| 1  | 0 | -2.433540 | 3.920502  | 0.000000  |
| 1  | 0 | -1.127704 | 6.041071  | 0.000000  |
| 1  | 0 | 1.365143  | 5.949686  | 0.000000  |
| 1  | 0 | 2.530477  | 3.770877  | 0.000000  |

**1a (A: pd)**

Total energy: -3398.4005081 hartrees

|    |   |           |           |           |
|----|---|-----------|-----------|-----------|
| 6  | 0 | 0.415064  | 0.000000  | 0.321209  |
| 6  | 0 | 1.740164  | 0.000000  | 1.104015  |
| 6  | 0 | 3.226278  | 0.000000  | 3.010579  |
| 6  | 0 | 1.925949  | 0.000000  | 2.488402  |
| 6  | 0 | 2.862852  | 0.000000  | 0.252039  |
| 6  | 0 | 4.335803  | 0.000000  | 2.162314  |
| 6  | 0 | 4.153926  | 0.000000  | 0.774611  |
| 1  | 0 | 3.367596  | 0.000000  | 4.089067  |
| 1  | 0 | 1.081967  | 0.000000  | 3.173275  |
| 1  | 0 | 5.340272  | 0.000000  | 2.579514  |
| 1  | 0 | 5.012277  | 0.000000  | 0.104208  |
| 6  | 0 | 0.506616  | -1.230613 | -0.585492 |
| 6  | 0 | -0.083050 | -3.391056 | -1.499997 |
| 6  | 0 | -0.335263 | -2.341158 | -0.608303 |
| 6  | 0 | 1.632384  | -1.206802 | -1.431099 |
| 6  | 0 | 1.014611  | -3.343702 | -2.362649 |
| 6  | 0 | 1.884905  | -2.248990 | -2.320568 |
| 1  | 0 | -0.748818 | -4.251344 | -1.515181 |
| 1  | 0 | -1.168098 | -2.402039 | 0.077377  |
| 1  | 0 | 1.201750  | -4.162429 | -3.053876 |
| 1  | 0 | 2.761503  | -2.213204 | -2.965993 |
| 6  | 0 | 0.506616  | 1.230613  | -0.585492 |
| 6  | 0 | -0.083050 | 3.391056  | -1.499997 |
| 6  | 0 | -0.335263 | 2.341158  | -0.608303 |
| 6  | 0 | 1.632384  | 1.206802  | -1.431099 |
| 6  | 0 | 1.014611  | 3.343702  | -2.362649 |
| 6  | 0 | 1.884905  | 2.248990  | -2.320568 |
| 1  | 0 | -0.748818 | 4.251344  | -1.515181 |
| 1  | 0 | -1.168098 | 2.402039  | 0.077377  |
| 1  | 0 | 1.201750  | 4.162429  | -3.053876 |
| 1  | 0 | 2.761503  | 2.213204  | -2.965993 |
| 6  | 0 | 2.515814  | 0.000000  | -1.223943 |
| 1  | 0 | 3.402124  | 0.000000  | -1.870251 |
| 34 | 0 | -1.080214 | 0.000000  | 1.647553  |
| 6  | 0 | -2.747314 | 0.000000  | 0.658990  |
| 6  | 0 | -3.415690 | 1.209356  | 0.406383  |
| 6  | 0 | -4.679386 | 1.206655  | -0.189681 |
| 6  | 0 | -5.309521 | 0.000000  | -0.502771 |
| 6  | 0 | -3.415690 | -1.209356 | 0.406383  |
| 6  | 0 | -4.679386 | -1.206655 | -0.189681 |
| 1  | 0 | -2.968020 | 2.154014  | 0.697129  |
| 1  | 0 | -5.178577 | 2.152213  | -0.389310 |
| 1  | 0 | -6.292050 | 0.000000  | -0.968690 |
| 1  | 0 | -2.968020 | -2.154014 | 0.697129  |
| 1  | 0 | -5.178577 | -2.152213 | -0.389310 |

**1a (B: pd)**

Total energy: -3398.3971336 hartrees

|   |   |           |           |          |
|---|---|-----------|-----------|----------|
| 6 | 0 | -0.313295 | -0.399054 | 0.000000 |
| 6 | 0 | 1.202874  | -0.136629 | 0.000000 |
| 6 | 0 | 3.302064  | 1.073806  | 0.000000 |
| 6 | 0 | 1.900745  | 1.074338  | 0.000000 |

|    |   |           |           |           |
|----|---|-----------|-----------|-----------|
| 6  | 0 | 1.939607  | -1.342217 | 0.000000  |
| 6  | 0 | 4.021502  | -0.121676 | 0.000000  |
| 6  | 0 | 3.332511  | -1.338392 | 0.000000  |
| 1  | 0 | 3.829006  | 2.025651  | 0.000000  |
| 1  | 0 | 1.383024  | 2.020947  | 0.000000  |
| 1  | 0 | 5.109146  | -0.108475 | 0.000000  |
| 1  | 0 | 3.875344  | -2.282677 | 0.000000  |
| 6  | 0 | -0.565290 | -1.294951 | 1.230002  |
| 6  | 0 | -1.503044 | -1.994148 | 3.348633  |
| 6  | 0 | -1.412542 | -1.052677 | 2.314884  |
| 6  | 0 | 0.194392  | -2.479913 | 1.206377  |
| 6  | 0 | -0.752526 | -3.171470 | 3.312958  |
| 6  | 0 | 0.106010  | -3.414483 | 2.235637  |
| 1  | 0 | -2.166625 | -1.799479 | 4.188421  |
| 1  | 0 | -2.000639 | -0.141733 | 2.362885  |
| 1  | 0 | -0.831365 | -3.894767 | 4.121556  |
| 1  | 0 | 0.705025  | -4.323384 | 2.197914  |
| 6  | 0 | -0.565290 | -1.294951 | -1.230002 |
| 6  | 0 | -1.503044 | -1.994148 | -3.348633 |
| 6  | 0 | -1.412542 | -1.052677 | -2.314884 |
| 6  | 0 | 0.194392  | -2.479913 | -1.206377 |
| 6  | 0 | -0.752526 | -3.171470 | -3.312958 |
| 6  | 0 | 0.106010  | -3.414483 | -2.235637 |
| 1  | 0 | -2.166625 | -1.799479 | -4.188421 |
| 1  | 0 | -2.000639 | -0.141733 | -2.362885 |
| 1  | 0 | -0.831365 | -3.894767 | -4.121556 |
| 1  | 0 | 0.705025  | -4.323384 | -2.197914 |
| 6  | 0 | 1.094010  | -2.595415 | 0.000000  |
| 1  | 0 | 1.695642  | -3.512706 | 0.000000  |
| 34 | 0 | -1.642206 | 1.109062  | 0.000000  |
| 6  | 0 | -0.712648 | 2.788025  | 0.000000  |
| 6  | 0 | 0.206174  | 4.671145  | -1.211142 |
| 6  | 0 | -0.421612 | 3.423091  | -1.216989 |
| 6  | 0 | 0.522453  | 5.295078  | 0.000000  |
| 6  | 0 | 0.206174  | 4.671145  | 1.211142  |
| 6  | 0 | -0.421612 | 3.423091  | 1.216989  |
| 1  | 0 | 0.441813  | 5.159521  | -2.154132 |
| 1  | 0 | -0.661839 | 2.928277  | -2.154884 |
| 1  | 0 | 1.012431  | 6.265972  | 0.000000  |
| 1  | 0 | 0.441813  | 5.159521  | 2.154132  |
| 1  | 0 | -0.661839 | 2.928277  | 2.154884  |

**1b' (A: pl)**

Total energy: -3453.6003225 hartrees

|   |   |          |           |           |
|---|---|----------|-----------|-----------|
| 6 | 0 | 0.679940 | -0.361982 | -0.181122 |
| 6 | 0 | 2.088974 | -0.965463 | -0.229768 |
| 6 | 0 | 3.811370 | -2.609011 | -0.630892 |
| 6 | 0 | 2.459784 | -2.240335 | -0.660097 |
| 6 | 0 | 3.071129 | -0.066026 | 0.228377  |
| 6 | 0 | 4.783914 | -1.714893 | -0.176500 |
| 6 | 0 | 4.413433 | -0.436341 | 0.257432  |
| 1 | 0 | 4.101838 | -3.602266 | -0.965782 |
| 1 | 0 | 1.718286 | -2.955171 | -1.009376 |
| 1 | 0 | 5.829823 | -2.012849 | -0.157705 |
| 1 | 0 | 5.165479 | 0.265477  | 0.615313  |



|    |   |           |           |           |
|----|---|-----------|-----------|-----------|
| 6  | 0 | 0.779717  | 0.920864  | -1.014770 |
| 6  | 0 | 0.296063  | 2.465818  | -2.806887 |
| 6  | 0 | 0.054119  | 1.245832  | -2.163158 |
| 6  | 0 | 1.763033  | 1.806269  | -0.537035 |
| 6  | 0 | 1.259728  | 3.352473  | -2.317170 |
| 6  | 0 | 2.001550  | 3.020795  | -1.177851 |
| 1  | 0 | -0.271529 | 2.720957  | -3.699161 |
| 1  | 0 | -0.693730 | 0.558535  | -2.551111 |
| 1  | 0 | 1.438574  | 4.297219  | -2.825888 |
| 1  | 0 | 2.766987  | 3.696909  | -0.799289 |
| 6  | 0 | 0.486541  | 0.055387  | 1.279733  |
| 6  | 0 | -0.478076 | 0.084427  | 3.492546  |
| 6  | 0 | -0.479309 | -0.401808 | 2.179307  |
| 6  | 0 | 1.473051  | 0.959947  | 1.715389  |
| 6  | 0 | 0.483462  | 1.007792  | 3.913116  |
| 6  | 0 | 1.471053  | 1.443107  | 3.022699  |
| 1  | 0 | -1.234834 | -0.265979 | 4.190978  |
| 1  | 0 | -1.225491 | -1.127135 | 1.869793  |
| 1  | 0 | 0.471570  | 1.378823  | 4.935625  |
| 1  | 0 | 2.241782  | 2.140647  | 3.348001  |
| 6  | 0 | 2.513902  | 1.276224  | 0.663395  |
| 1  | 0 | 3.289622  | 1.963835  | 1.022338  |
| 34 | 0 | -0.635355 | -1.658922 | -0.856932 |
| 6  | 0 | -2.306385 | -0.802166 | -0.436526 |
| 6  | 0 | -2.469920 | 0.567188  | -0.189060 |
| 6  | 0 | -3.738824 | 1.077208  | 0.087895  |
| 6  | 0 | -4.874492 | 0.253906  | 0.071461  |
| 6  | 0 | -4.698922 | -1.117507 | -0.170632 |
| 6  | 0 | -3.432602 | -1.638696 | -0.430152 |
| 1  | 0 | -1.617398 | 1.237850  | -0.175221 |
| 1  | 0 | -3.849454 | 2.141336  | 0.293873  |
| 1  | 0 | -5.562154 | -1.781822 | -0.163762 |
| 1  | 0 | -3.321746 | -2.709173 | -0.597485 |
| 7  | 0 | -6.138870 | 0.765834  | 0.409596  |
| 1  | 0 | -6.906576 | 0.243350  | -0.000604 |
| 1  | 0 | -6.240279 | 1.753906  | 0.199627  |

**1b' (A: pd)**

Total energy: -3453.5925584 hartrees

|   |   |           |           |          |
|---|---|-----------|-----------|----------|
| 6 | 0 | 0.332464  | -0.683015 | 0.000000 |
| 6 | 0 | 1.042651  | -2.048181 | 0.000000 |
| 6 | 0 | 2.868204  | -3.633038 | 0.000000 |
| 6 | 0 | 2.415364  | -2.306966 | 0.000000 |
| 6 | 0 | 0.133021  | -3.124608 | 0.000000 |
| 6 | 0 | 1.962675  | -4.696398 | 0.000000 |
| 6 | 0 | 0.586505  | -4.441568 | 0.000000 |
| 1 | 0 | 3.937766  | -3.831056 | 0.000000 |
| 1 | 0 | 3.143394  | -1.500012 | 0.000000 |
| 1 | 0 | 2.326304  | -5.721513 | 0.000000 |
| 1 | 0 | -0.128266 | -5.263387 | 0.000000 |
| 6 | 0 | -0.579196 | -0.726334 | 1.229562 |
| 6 | 0 | -1.464779 | -0.085033 | 3.387254 |
| 6 | 0 | -0.560497 | 0.119099  | 2.337601 |
| 6 | 0 | -1.482508 | -1.806419 | 1.206774 |
| 6 | 0 | -2.381965 | -1.137733 | 3.342030 |

|    |   |           |           |           |
|----|---|-----------|-----------|-----------|
| 6  | 0 | -2.384437 | -2.011002 | 2.248824  |
| 1  | 0 | -1.446599 | 0.582546  | 4.246161  |
| 1  | 0 | 0.164915  | 0.917853  | 2.395119  |
| 1  | 0 | -3.081970 | -1.287943 | 4.160986  |
| 1  | 0 | -3.074392 | -2.853102 | 2.214180  |
| 6  | 0 | -0.579196 | -0.726334 | -1.229562 |
| 6  | 0 | -1.464779 | -0.085033 | -3.387254 |
| 6  | 0 | -0.560497 | 0.119099  | -2.337601 |
| 6  | 0 | -1.482508 | -1.806419 | -1.206774 |
| 6  | 0 | -2.381965 | -1.137733 | -3.342030 |
| 6  | 0 | -2.384437 | -2.011002 | -2.248824 |
| 1  | 0 | -1.446599 | 0.582546  | -4.246161 |
| 1  | 0 | 0.164915  | 0.917853  | -2.395119 |
| 1  | 0 | -3.081970 | -1.287943 | -4.160986 |
| 1  | 0 | -3.074392 | -2.853102 | -2.214180 |
| 6  | 0 | -1.322372 | -2.699823 | 0.000000  |
| 1  | 0 | -2.014839 | -3.550633 | 0.000000  |
| 34 | 0 | 1.735337  | 0.741746  | 0.000000  |
| 6  | 0 | 0.836526  | 2.451212  | 0.000000  |
| 6  | 0 | 0.617977  | 3.141547  | -1.203827 |
| 6  | 0 | 0.092549  | 4.431793  | -1.204646 |
| 6  | 0 | -0.208278 | 5.086267  | 0.000000  |
| 6  | 0 | 0.617977  | 3.141547  | 1.203827  |
| 6  | 0 | 0.092549  | 4.431793  | 1.204646  |
| 1  | 0 | 0.885712  | 2.688078  | -2.152979 |
| 1  | 0 | -0.072196 | 4.944385  | -2.151436 |
| 1  | 0 | 0.885712  | 2.688078  | 2.152979  |
| 1  | 0 | -0.072196 | 4.944385  | 2.151436  |
| 7  | 0 | -0.682464 | 6.403215  | 0.000000  |
| 1  | 0 | -1.202902 | 6.653406  | -0.834179 |
| 1  | 0 | -1.202902 | 6.653406  | 0.834179  |

**1b' (B: pd)**

Total energy: -3453.5892781 hartrees

|   |   |           |           |          |
|---|---|-----------|-----------|----------|
| 6 | 0 | -0.325827 | -0.665599 | 0.000000 |
| 6 | 0 | 1.173036  | -0.316249 | 0.000000 |
| 6 | 0 | 3.198870  | 1.013487  | 0.000000 |
| 6 | 0 | 1.799813  | 0.933389  | 0.000000 |
| 6 | 0 | 1.978467  | -1.477118 | 0.000000 |
| 6 | 0 | 3.986248  | -0.138446 | 0.000000 |
| 6 | 0 | 3.368855  | -1.393014 | 0.000000 |
| 1 | 0 | 3.669483  | 1.994432  | 0.000000 |
| 1 | 0 | 1.228110  | 1.848480  | 0.000000 |
| 1 | 0 | 5.071373  | -0.062397 | 0.000000 |
| 1 | 0 | 3.965360  | -2.304412 | 0.000000 |
| 6 | 0 | -0.524857 | -1.575331 | 1.229465 |
| 6 | 0 | -1.420698 | -2.327875 | 3.348212 |
| 6 | 0 | -1.384730 | -1.382765 | 2.314436 |
| 6 | 0 | 0.302090  | -2.714412 | 1.206228 |
| 6 | 0 | -0.603261 | -3.459784 | 3.312711 |
| 6 | 0 | 0.267990  | -3.652615 | 2.235438 |
| 1 | 0 | -2.094512 | -2.171985 | 4.188007 |
| 1 | 0 | -2.024224 | -0.507120 | 2.361946 |
| 1 | 0 | -0.640091 | -4.186429 | 4.121369 |
| 1 | 0 | 0.918764  | -4.525251 | 2.197798 |

|    |   |           |           |           |
|----|---|-----------|-----------|-----------|
| 6  | 0 | -0.524857 | -1.575331 | -1.229465 |
| 6  | 0 | -1.420698 | -2.327875 | -3.348212 |
| 6  | 0 | -1.384730 | -1.382765 | -2.314436 |
| 6  | 0 | 0.302090  | -2.714412 | -1.206228 |
| 6  | 0 | -0.603261 | -3.459784 | -3.312711 |
| 6  | 0 | 0.267990  | -3.652615 | -2.235438 |
| 1  | 0 | -2.094512 | -2.171985 | -4.188007 |
| 1  | 0 | -2.024224 | -0.507120 | -2.361946 |
| 1  | 0 | -0.640091 | -4.186429 | -4.121369 |
| 1  | 0 | 0.918764  | -4.525251 | -2.197798 |
| 6  | 0 | 1.207003  | -2.777348 | 0.000000  |
| 1  | 0 | 1.860884  | -3.658223 | 0.000000  |
| 34 | 0 | -1.739494 | 0.765786  | 0.000000  |
| 6  | 0 | -0.905111 | 2.486743  | 0.000000  |
| 6  | 0 | -0.071535 | 4.415156  | -1.209003 |
| 6  | 0 | -0.643028 | 3.144709  | -1.211269 |
| 6  | 0 | 0.207218  | 5.075500  | 0.000000  |
| 6  | 0 | -0.071535 | 4.415156  | 1.209003  |
| 6  | 0 | -0.643028 | 3.144709  | 1.211269  |
| 1  | 0 | 0.140543  | 4.913273  | -2.154214 |
| 1  | 0 | -0.851755 | 2.644702  | -2.154215 |
| 1  | 0 | 0.140543  | 4.913273  | 2.154214  |
| 1  | 0 | -0.851755 | 2.644702  | 2.154215  |
| 7  | 0 | 0.843989  | 6.321738  | 0.000000  |
| 1  | 0 | 0.673563  | 6.872896  | -0.834642 |
| 1  | 0 | 0.673563  | 6.872896  | 0.834642  |

# **1e (A: pl)**

Total energy: -3490.4202495 hartrees

|   |   |           |           |           |
|---|---|-----------|-----------|-----------|
| 6 | 0 | 0.401925  | -0.839073 | 0.000000  |
| 6 | 0 | 0.926626  | -2.279620 | 0.000000  |
| 6 | 0 | 2.530998  | -4.082686 | 0.000000  |
| 6 | 0 | 2.254537  | -2.709000 | 0.000000  |
| 6 | 0 | -0.118501 | -3.223490 | 0.000000  |
| 6 | 0 | 1.493045  | -5.017749 | 0.000000  |
| 6 | 0 | 0.160552  | -4.587968 | 0.000000  |
| 1 | 0 | 3.564997  | -4.419826 | 0.000000  |
| 1 | 0 | 3.079424  | -1.999893 | 0.000000  |
| 1 | 0 | 1.720218  | -6.081329 | 0.000000  |
| 1 | 0 | -0.653409 | -5.311455 | 0.000000  |
| 6 | 0 | -0.499030 | -0.750733 | 1.235875  |
| 6 | 0 | -1.279673 | 0.018206  | 3.386916  |
| 6 | 0 | -0.358043 | 0.098468  | 2.335690  |
| 6 | 0 | -1.539421 | -1.697756 | 1.211689  |
| 6 | 0 | -2.328066 | -0.905809 | 3.348108  |
| 6 | 0 | -2.456438 | -1.774427 | 2.258494  |
| 1 | 0 | -1.173934 | 0.682313  | 4.241812  |
| 1 | 0 | 0.460354  | 0.812124  | 2.381682  |
| 1 | 0 | -3.038234 | -0.957297 | 4.170304  |
| 1 | 0 | -3.256513 | -2.512797 | 2.230590  |
| 6 | 0 | -0.499030 | -0.750733 | -1.235875 |
| 6 | 0 | -1.279673 | 0.018206  | -3.386916 |
| 6 | 0 | -0.358043 | 0.098468  | -2.335690 |
| 6 | 0 | -1.539421 | -1.697756 | -1.211689 |
| 6 | 0 | -2.328066 | -0.905809 | -3.348108 |

|    |   |           |           |           |
|----|---|-----------|-----------|-----------|
| 6  | 0 | -2.456438 | -1.774427 | -2.258494 |
| 1  | 0 | -1.173934 | 0.682313  | -4.241812 |
| 1  | 0 | 0.460354  | 0.812124  | -2.381682 |
| 1  | 0 | -3.038234 | -0.957297 | -4.170304 |
| 1  | 0 | -3.256513 | -2.512797 | -2.230590 |
| 6  | 0 | -1.503117 | -2.602958 | 0.000000  |
| 1  | 0 | -2.305412 | -3.350853 | 0.000000  |
| 34 | 0 | 1.907445  | 0.423231  | 0.000000  |
| 6  | 0 | 1.018731  | 2.123021  | 0.000000  |
| 6  | 0 | -0.372583 | 2.307131  | 0.000000  |
| 6  | 0 | -0.901858 | 3.597755  | 0.000000  |
| 6  | 0 | -0.049456 | 4.712527  | 0.000000  |
| 6  | 0 | 1.344011  | 4.529993  | 0.000000  |
| 6  | 0 | 1.870268  | 3.241688  | 0.000000  |
| 1  | 0 | -1.048110 | 1.459278  | 0.000000  |
| 1  | 0 | -1.979914 | 3.741795  | 0.000000  |
| 1  | 0 | 2.004617  | 5.393703  | 0.000000  |
| 1  | 0 | 2.950917  | 3.107354  | 0.000000  |
| 6  | 0 | -0.599727 | 6.037476  | 0.000000  |
| 7  | 0 | -1.053493 | 7.132146  | 0.000000  |

**1e (A: pd)**

Total energy: -3490.4089826 hartrees

|   |   |           |           |           |
|---|---|-----------|-----------|-----------|
| 6 | 0 | 0.343181  | -0.839535 | 0.000000  |
| 6 | 0 | 0.971881  | -2.242597 | 0.000000  |
| 6 | 0 | 2.696449  | -3.934195 | 0.000000  |
| 6 | 0 | 2.325909  | -2.582680 | 0.000000  |
| 6 | 0 | -0.005188 | -3.258914 | 0.000000  |
| 6 | 0 | 1.726304  | -4.938921 | 0.000000  |
| 6 | 0 | 0.367828  | -4.600736 | 0.000000  |
| 1 | 0 | 3.751515  | -4.198351 | 0.000000  |
| 1 | 0 | 3.101732  | -1.820804 | 0.000000  |
| 1 | 0 | 2.026022  | -5.984401 | 0.000000  |
| 1 | 0 | -0.395031 | -5.377992 | 0.000000  |
| 6 | 0 | -0.560956 | -0.830474 | 1.235700  |
| 6 | 0 | -1.367912 | -0.172886 | 3.420046  |
| 6 | 0 | -0.460499 | -0.018861 | 2.364710  |
| 6 | 0 | -1.537147 | -1.844584 | 1.207433  |
| 6 | 0 | -2.369223 | -1.145030 | 3.360251  |
| 6 | 0 | -2.444422 | -1.997792 | 2.253690  |
| 1 | 0 | -1.286231 | 0.469341  | 4.294293  |
| 1 | 0 | 0.343439  | 0.699220  | 2.444233  |
| 1 | 0 | -3.073115 | -1.255140 | 4.182029  |
| 1 | 0 | -3.193031 | -2.787756 | 2.213414  |
| 6 | 0 | -0.560956 | -0.830474 | -1.235700 |
| 6 | 0 | -1.367912 | -0.172886 | -3.420046 |
| 6 | 0 | -0.460499 | -0.018861 | -2.364710 |
| 6 | 0 | -1.537147 | -1.844584 | -1.207433 |
| 6 | 0 | -2.369223 | -1.145030 | -3.360251 |
| 6 | 0 | -2.444422 | -1.997792 | -2.253690 |
| 1 | 0 | -1.286231 | 0.469341  | -4.294293 |
| 1 | 0 | 0.343439  | 0.699220  | -2.444233 |
| 1 | 0 | -3.073115 | -1.255140 | -4.182029 |
| 1 | 0 | -3.193031 | -2.787756 | -2.213414 |
| 6 | 0 | -1.433543 | -2.744383 | 0.000000  |

|    |   |           |           |           |
|----|---|-----------|-----------|-----------|
| 1  | 0 | -2.176548 | -3.551210 | 0.000000  |
| 34 | 0 | 1.811707  | 0.514901  | 0.000000  |
| 6  | 0 | 0.954666  | 2.253962  | 0.000000  |
| 6  | 0 | 0.748934  | 2.941064  | -1.209019 |
| 6  | 0 | 0.243269  | 4.240194  | -1.215250 |
| 6  | 0 | -0.024611 | 4.889247  | 0.000000  |
| 6  | 0 | 0.748934  | 2.941064  | 1.209019  |
| 6  | 0 | 0.243269  | 4.240194  | 1.215250  |
| 1  | 0 | 1.002364  | 2.475315  | -2.154720 |
| 1  | 0 | 0.075602  | 4.760073  | -2.155430 |
| 1  | 0 | 1.002364  | 2.475315  | 2.154720  |
| 1  | 0 | 0.075602  | 4.760073  | 2.155430  |
| 6  | 0 | -0.551352 | 6.224523  | 0.000000  |
| 7  | 0 | -0.985348 | 7.327118  | 0.000000  |

**1e (B: pd)**

Total energy: -3490.4053554 hartrees

|    |   |           |           |           |
|----|---|-----------|-----------|-----------|
| 6  | 0 | -0.319662 | -0.825636 | 0.000000  |
| 6  | 0 | 1.168337  | -0.436574 | 0.000000  |
| 6  | 0 | 3.160234  | 0.944701  | 0.000000  |
| 6  | 0 | 1.763882  | 0.827543  | 0.000000  |
| 6  | 0 | 2.002178  | -1.577050 | 0.000000  |
| 6  | 0 | 3.975689  | -0.187401 | 0.000000  |
| 6  | 0 | 3.389937  | -1.457045 | 0.000000  |
| 1  | 0 | 3.606862  | 1.936706  | 0.000000  |
| 1  | 0 | 1.169965  | 1.728134  | 0.000000  |
| 1  | 0 | 5.058362  | -0.084007 | 0.000000  |
| 1  | 0 | 4.009457  | -2.352781 | 0.000000  |
| 6  | 0 | -0.498804 | -1.737507 | 1.230779  |
| 6  | 0 | -1.376342 | -2.512971 | 3.348444  |
| 6  | 0 | -1.364051 | -1.566807 | 2.315101  |
| 6  | 0 | 0.356812  | -2.855190 | 1.206487  |
| 6  | 0 | -0.530206 | -3.623470 | 3.312642  |
| 6  | 0 | 0.345978  | -3.793924 | 2.235655  |
| 1  | 0 | -2.054372 | -2.374757 | 4.187781  |
| 1  | 0 | -2.027205 | -0.709013 | 2.364294  |
| 1  | 0 | -0.548822 | -4.350984 | 4.120974  |
| 1  | 0 | 1.018366  | -4.649879 | 2.197994  |
| 6  | 0 | -0.498804 | -1.737507 | -1.230779 |
| 6  | 0 | -1.376342 | -2.512971 | -3.348444 |
| 6  | 0 | -1.364051 | -1.566807 | -2.315101 |
| 6  | 0 | 0.356812  | -2.855190 | -1.206487 |
| 6  | 0 | -0.530206 | -3.623470 | -3.312642 |
| 6  | 0 | 0.345978  | -3.793924 | -2.235655 |
| 1  | 0 | -2.054372 | -2.374757 | -4.187781 |
| 1  | 0 | -2.027205 | -0.709013 | -2.364294 |
| 1  | 0 | -0.548822 | -4.350984 | -4.120974 |
| 1  | 0 | 1.018366  | -4.649879 | -2.197994 |
| 6  | 0 | 1.262947  | -2.895751 | 0.000000  |
| 1  | 0 | 1.938252  | -3.760106 | 0.000000  |
| 34 | 0 | -1.770818 | 0.565995  | 0.000000  |
| 6  | 0 | -0.986633 | 2.316817  | 0.000000  |
| 6  | 0 | -0.249059 | 4.277288  | -1.220034 |
| 6  | 0 | -0.756828 | 2.979202  | -1.216874 |
| 6  | 0 | 0.008013  | 4.926250  | 0.000000  |

|   |   |           |          |           |
|---|---|-----------|----------|-----------|
| 6 | 0 | -0.249059 | 4.277288 | 1.220034  |
| 6 | 0 | -0.756828 | 2.979202 | 1.216874  |
| 1 | 0 | -0.056828 | 4.793646 | -2.157556 |
| 1 | 0 | -0.951146 | 2.466015 | -2.155314 |
| 1 | 0 | -0.056828 | 4.793646 | 2.157556  |
| 1 | 0 | -0.951146 | 2.466015 | 2.155314  |
| 6 | 0 | 0.533937  | 6.262126 | 0.000000  |
| 7 | 0 | 0.968827  | 7.364405 | 0.000000  |

**1f (A: pl)**

Total energy: -3602.412882 hartrees

|    |   |           |           |           |
|----|---|-----------|-----------|-----------|
| 6  | 0 | 0.410229  | -1.112686 | 0.000000  |
| 6  | 0 | 0.908586  | -2.562441 | 0.000000  |
| 6  | 0 | 2.479505  | -4.394658 | 0.000000  |
| 6  | 0 | 2.228402  | -3.016118 | 0.000000  |
| 6  | 0 | -0.153826 | -3.486829 | 0.000000  |
| 6  | 0 | 1.424480  | -5.310422 | 0.000000  |
| 6  | 0 | 0.100118  | -4.856203 | 0.000000  |
| 1  | 0 | 3.507113  | -4.750791 | 0.000000  |
| 1  | 0 | 3.066311  | -2.322426 | 0.000000  |
| 1  | 0 | 1.632038  | -6.378000 | 0.000000  |
| 1  | 0 | -0.727018 | -5.564585 | 0.000000  |
| 6  | 0 | -0.488716 | -1.007584 | 1.236022  |
| 6  | 0 | -1.255129 | -0.224563 | 3.387142  |
| 6  | 0 | -0.331943 | -0.161477 | 2.336113  |
| 6  | 0 | -1.546533 | -1.935098 | 1.211631  |
| 6  | 0 | -2.320723 | -1.128632 | 3.347902  |
| 6  | 0 | -2.465011 | -1.994676 | 2.258252  |
| 1  | 0 | -1.137174 | 0.437362  | 4.242120  |
| 1  | 0 | 0.500032  | 0.536267  | 2.382931  |
| 1  | 0 | -3.032018 | -1.166734 | 4.169836  |
| 1  | 0 | -3.278780 | -2.717901 | 2.230074  |
| 6  | 0 | -0.488716 | -1.007584 | -1.236022 |
| 6  | 0 | -1.255129 | -0.224563 | -3.387142 |
| 6  | 0 | -0.331943 | -0.161477 | -2.336113 |
| 6  | 0 | -1.546533 | -1.935098 | -1.211631 |
| 6  | 0 | -2.320723 | -1.128632 | -3.347902 |
| 6  | 0 | -2.465011 | -1.994676 | -2.258252 |
| 1  | 0 | -1.137174 | 0.437362  | -4.242120 |
| 1  | 0 | 0.500032  | 0.536267  | -2.382931 |
| 1  | 0 | -3.032018 | -1.166734 | -4.169836 |
| 1  | 0 | -3.278780 | -2.717901 | -2.230074 |
| 6  | 0 | -1.526810 | -2.840873 | 0.000000  |
| 1  | 0 | -2.342763 | -3.573835 | 0.000000  |
| 34 | 0 | 1.938340  | 0.122070  | 0.000000  |
| 6  | 0 | 1.080143  | 1.836051  | 0.000000  |
| 6  | 0 | -0.308102 | 2.044804  | 0.000000  |
| 6  | 0 | -0.818957 | 3.343590  | 0.000000  |
| 6  | 0 | 0.066543  | 4.418500  | 0.000000  |
| 6  | 0 | 1.449944  | 4.239914  | 0.000000  |
| 6  | 0 | 1.950323  | 2.940673  | 0.000000  |
| 1  | 0 | -0.998308 | 1.209043  | 0.000000  |
| 1  | 0 | -1.889137 | 3.523177  | 0.000000  |
| 1  | 0 | 2.109870  | 5.100960  | 0.000000  |
| 1  | 0 | 3.028416  | 2.788035  | 0.000000  |

|   |   |           |          |          |
|---|---|-----------|----------|----------|
| 7 | 0 | -0.472084 | 5.783293 | 0.000000 |
| 8 | 0 | -1.708258 | 5.916241 | 0.000000 |
| 8 | 0 | 0.341201  | 6.723951 | 0.000000 |

# 1f (A: pd)

Total energy: -3602.4014637 hartrees

|    |   |           |           |           |
|----|---|-----------|-----------|-----------|
| 6  | 0 | 0.349607  | -1.120350 | 0.000000  |
| 6  | 0 | 0.945828  | -2.537311 | 0.000000  |
| 6  | 0 | 2.630782  | -4.268158 | 0.000000  |
| 6  | 0 | 2.291615  | -2.908413 | 0.000000  |
| 6  | 0 | -0.054782 | -3.530562 | 0.000000  |
| 6  | 0 | 1.637561  | -5.250080 | 0.000000  |
| 6  | 0 | 0.287215  | -4.880612 | 0.000000  |
| 1  | 0 | 3.679429  | -4.556738 | 0.000000  |
| 1  | 0 | 3.084745  | -2.164507 | 0.000000  |
| 1  | 0 | 1.912983  | -6.302221 | 0.000000  |
| 1  | 0 | -0.493331 | -5.640103 | 0.000000  |
| 6  | 0 | -0.553357 | -1.090908 | 1.236276  |
| 6  | 0 | -1.341208 | -0.418477 | 3.423201  |
| 6  | 0 | -0.431127 | -0.285080 | 2.367356  |
| 6  | 0 | -1.553642 | -2.081197 | 1.207517  |
| 6  | 0 | -2.366920 | -1.364754 | 3.361988  |
| 6  | 0 | -2.463739 | -2.213682 | 2.254172  |
| 1  | 0 | -1.242448 | 0.219401  | 4.298856  |
| 1  | 0 | 0.392306  | 0.410382  | 2.449044  |
| 1  | 0 | -3.072823 | -1.458743 | 4.184037  |
| 1  | 0 | -3.231280 | -2.985237 | 2.213375  |
| 6  | 0 | -0.553357 | -1.090908 | -1.236276 |
| 6  | 0 | -1.341208 | -0.418477 | -3.423201 |
| 6  | 0 | -0.431127 | -0.285080 | -2.367356 |
| 6  | 0 | -1.553642 | -2.081197 | -1.207517 |
| 6  | 0 | -2.366920 | -1.364754 | -3.361988 |
| 6  | 0 | -2.463739 | -2.213682 | -2.254172 |
| 1  | 0 | -1.242448 | 0.219401  | -4.298856 |
| 1  | 0 | 0.392306  | 0.410382  | -2.449044 |
| 1  | 0 | -3.072823 | -1.458743 | -4.184037 |
| 1  | 0 | -3.231280 | -2.985237 | -2.213375 |
| 6  | 0 | -1.471031 | -2.982971 | 0.000000  |
| 1  | 0 | -2.232472 | -3.772418 | 0.000000  |
| 34 | 0 | 1.846053  | 0.202418  | 0.000000  |
| 6  | 0 | 1.020565  | 1.956336  | 0.000000  |
| 6  | 0 | 0.826106  | 2.647557  | -1.208885 |
| 6  | 0 | 0.342880  | 3.956078  | -1.219345 |
| 6  | 0 | 0.096451  | 4.582324  | 0.000000  |
| 6  | 0 | 0.826106  | 2.647557  | 1.208885  |
| 6  | 0 | 0.342880  | 3.956078  | 1.219345  |
| 1  | 0 | 1.070100  | 2.177455  | -2.154649 |
| 1  | 0 | 0.178530  | 4.491584  | -2.148449 |
| 1  | 0 | 1.070100  | 2.177455  | 2.154649  |
| 1  | 0 | 0.178530  | 4.491584  | 2.148449  |
| 7  | 0 | -0.417375 | 5.959776  | 0.000000  |
| 8  | 0 | -0.618442 | 6.498124  | 1.102056  |
| 8  | 0 | -0.618442 | 6.498124  | -1.102056 |

**1f (B: pd)**

Total energy: -3602.3976815 hartrees

|    |   |           |           |           |
|----|---|-----------|-----------|-----------|
| 6  | 0 | -0.323424 | -1.108304 | 0.000000  |
| 6  | 0 | 1.157829  | -0.694422 | 0.000000  |
| 6  | 0 | 3.126459  | 0.719898  | 0.000000  |
| 6  | 0 | 1.732265  | 0.579356  | 0.000000  |
| 6  | 0 | 2.010543  | -1.820832 | 0.000000  |
| 6  | 0 | 3.960635  | -0.398448 | 0.000000  |
| 6  | 0 | 3.396103  | -1.677680 | 0.000000  |
| 1  | 0 | 3.556534  | 1.719182  | 0.000000  |
| 1  | 0 | 1.123128  | 1.469687  | 0.000000  |
| 1  | 0 | 5.041426  | -0.277022 | 0.000000  |
| 1  | 0 | 4.030488  | -2.562945 | 0.000000  |
| 6  | 0 | -0.487465 | -2.022956 | 1.230817  |
| 6  | 0 | -1.351907 | -2.812823 | 3.348500  |
| 6  | 0 | -1.355447 | -1.866624 | 2.315102  |
| 6  | 0 | 0.386740  | -3.126149 | 1.206518  |
| 6  | 0 | -0.487358 | -3.909031 | 3.312715  |
| 6  | 0 | 0.391540  | -4.064894 | 2.235713  |
| 1  | 0 | -2.032083 | -2.685842 | 4.187869  |
| 1  | 0 | -2.032904 | -1.020087 | 2.364447  |
| 1  | 0 | -0.493817 | -4.636721 | 4.121074  |
| 1  | 0 | 1.078144  | -4.909487 | 2.198133  |
| 6  | 0 | -0.487465 | -2.022956 | -1.230817 |
| 6  | 0 | -1.351907 | -2.812823 | -3.348500 |
| 6  | 0 | -1.355447 | -1.866624 | -2.315102 |
| 6  | 0 | 0.386740  | -3.126149 | -1.206518 |
| 6  | 0 | -0.487358 | -3.909031 | -3.312715 |
| 6  | 0 | 0.391540  | -4.064894 | -2.235713 |
| 1  | 0 | -2.032083 | -2.685842 | -4.187869 |
| 1  | 0 | -2.032904 | -1.020087 | -2.364447 |
| 1  | 0 | -0.493817 | -4.636721 | -4.121074 |
| 1  | 0 | 1.078144  | -4.909487 | -2.198133 |
| 6  | 0 | 1.293412  | -3.151666 | 0.000000  |
| 1  | 0 | 1.983065  | -4.004599 | 0.000000  |
| 34 | 0 | -1.797439 | 0.258373  | 0.000000  |
| 6  | 0 | -1.043829 | 2.022212  | 0.000000  |
| 6  | 0 | -0.344973 | 3.998924  | -1.223769 |
| 6  | 0 | -0.826697 | 2.690029  | -1.216520 |
| 6  | 0 | -0.112369 | 4.626370  | 0.000000  |
| 6  | 0 | -0.344973 | 3.998924  | 1.223769  |
| 6  | 0 | -0.826697 | 2.690029  | 1.216520  |
| 1  | 0 | -0.158268 | 4.531783  | -2.150246 |
| 1  | 0 | -1.010749 | 2.173682  | -2.155151 |
| 1  | 0 | -0.158268 | 4.531783  | 2.150246  |
| 1  | 0 | -1.010749 | 2.173682  | 2.155151  |
| 7  | 0 | 0.399613  | 6.005647  | 0.000000  |
| 8  | 0 | 0.600087  | 6.544264  | 1.101971  |
| 8  | 0 | 0.600087  | 6.544264  | -1.101971 |
